# Supplementary material for: A Polymorphism in the Gene Encoding Heat Shock Factor 1 (HSF1) Increases the Risk of Type 2 Diabetes: A Pilot Study Supports a Role for Impaired Protein Folding in Disease Pathogenesis
Source: MDPI journal article supplement (doi:10.3390/life12111936), 2022-11-20
Supplement: s1 [file s1]

**Supplementary Table S1.** Association of the studied polymorphic gene Variants with clinical and laboratory parameters in T2D patients

| SNP                     | Genotype | Entire Group                      |                                       | Males                             |                                       | Females                           |                                    |
|-------------------------|----------|-----------------------------------|---------------------------------------|-----------------------------------|---------------------------------------|-----------------------------------|------------------------------------|
|                         |          | T2D Patients<br>( <i>n</i> = 489) | <i>P</i> <sup>2</sup><br>( <i>Q</i> ) | T2D Patients<br>( <i>n</i> = 145) | <i>P</i> <sup>2</sup><br>( <i>Q</i> ) | T2D Patients<br>( <i>n</i> = 344) | <i>P</i> <sup>2</sup> ( <i>Q</i> ) |
|                         |          | Me (Q1; Q3) <sup>1</sup>          |                                       | Me (Q1; Q3) <sup>1</sup>          |                                       | Me (Q1; Q3) <sup>1</sup>          |                                    |
| HbA1c                   |          |                                   |                                       |                                   |                                       |                                   |                                    |
| rs7838717<br>C>T        | C/C      | 9.00 (7.80; 10.5)                 | 0.21                                  | 9.20 (7.8;10.6)                   | 0.40                                  | 9.00 (7.8; 10.5)                  | 0.31                               |
|                         | C/T      | 9.10 (7.7; 11.0)                  |                                       | 9.50 (7.9; 11.1)                  |                                       | 9.06 (7.6;10.9)                   |                                    |
|                         | T/T      | 8.80 (7.7; 10.34)                 |                                       | 9.10 (7.9;11.0)                   |                                       | 8.55 (7.5; 10.0)                  |                                    |
| rs4279640<br>T>C        | T/T      | 9.00 (7.70; 10.8)                 | 0.93                                  | 9.10 (7.7; 10.6)                  | 0.66                                  | 9.00 (7.6; 10.8)                  | 0.92                               |
|                         | T/C      | 9.10 (7.70; 10.9)                 |                                       | 9.45 (8.0; 11.1)                  |                                       | 9.00 (7.7; 10.8)                  |                                    |
|                         | C/C      | 9.00 (7.9;10.5)                   |                                       | 9.10 (7.9; 11.0)                  |                                       | 9.00 (7.85; 10.4)                 |                                    |
| rs3757971<br>T>C        | T/T      | 9.00 (7.8; 10.6)                  | 0.32                                  | 9.15 (7.7;10.6)                   | 0.18                                  | 9.00 (7.9; 10.6)                  | 0.61                               |
|                         | T/C      | 9.10 (7.7;11.0)                   |                                       | 9.50 (7.9; 11.2)                  |                                       | 9.00 (7.9;10.8)                   |                                    |
|                         | C/C      | 8.80 (7.7; 10.5)                  |                                       | 9.05 (7.9; 10.5)                  |                                       | 8.60 (7.05;10.1)                  |                                    |
| Fasting blood glucose   |          |                                   |                                       |                                   |                                       |                                   |                                    |
| rs7838717<br>C>T        | C/C      | 12.10 (9.9; 15.0)                 | 0.62                                  | 11.80 (9.2; 15.0)                 | 0.11                                  | 12.20 (10.0; 15.0)                | 0.52                               |
|                         | C/T      | 12.35 (9.5; 15.4)                 |                                       | 12.80 (9.7; 15.4)                 |                                       | 12.00 (9.4; 15.4)                 |                                    |
|                         | T/T      | 12.00 (9.59; 15.0)                |                                       | 12.60 (10.0; 15.4)                |                                       | 11.70 (9.3; 14.9)                 |                                    |
| rs4279640<br>T>C        | T/T      | 12.00 (9.6; 15.1)                 | 0.87                                  | 12.60 (9.9; 15.2)                 | 0.72                                  | 12.00 (9.4; 15.0)                 | 0.55                               |
|                         | T/C      | 12.10 (9.6; 15.3)                 |                                       | 12.60 (9.4; 15.2)                 |                                       | 12.00 (9.6; 15.4)                 |                                    |
|                         | C/C      | 12.20 (9.9; 15.0)                 |                                       | 12.10 (9.5; 15.6)                 |                                       | 12.25 (10.1; 15.0)                |                                    |
| rs3757971<br>T>C        | T/T      | 12.10 (9.9; 15.0)                 | 0.75                                  | 11.90 (9.2; 15.0)                 | 0.12                                  | 12.20 (10.0; 15.1)                | 0.48                               |
|                         | T/C      | 12.25 (9.5; 15.4)                 |                                       | 12.75 (9.7; 15.4)                 |                                       | 12.00 (9.5; 15.4)                 |                                    |
|                         | C/C      | 12.00 (9.5; 15.1)                 |                                       | 12.50 (10.0; 15.5)                |                                       | 12.00 (9.3; 15.0)                 |                                    |
| Glucose after breakfast |          |                                   |                                       |                                   |                                       |                                   |                                    |
| rs7838717<br>C>T        | C/C      | 6.69 (5.7; 7.8)                   | 0.027                                 | 6.50 (5.5; 7.6)                   | 0.054                                 | 6.70 (5.7; 7.8)                   | 0.25                               |
|                         | C/T      | 6.50 (5.6; 7.6)                   |                                       | 6.60 (5.6; 7.6)                   |                                       | 6.50 (5.5; 7.6)                   |                                    |
|                         | T/T      | 6.30 (5.5; 7.7)                   |                                       | 5.90 (5.4; 7.3)                   |                                       | 6.38 (5.5; 8.0)                   |                                    |
| rs4279640<br>T>C        | T/T      | 6.37 (5.5; 7.7)                   | 0.22                                  | 6.30 (5.4; 7.6)                   | 0.82                                  | 6.40 (5.6; 7.8)                   | 0.26                               |
|                         | T/C      | 6.50 (5.6; 7.6)                   |                                       | 6.43 (5.6; 7.4)                   |                                       | 6.50 (5.6; 7.6)                   |                                    |
|                         | C/C      | 6.70 (5.6; 7.9)                   |                                       | 6.50 (5.5; 7.7)                   |                                       | 6.87 (5.6; 7.9)                   |                                    |
| rs3757971<br>T>C        | T/T      | 6.70 (5.6; 7.8)                   | 0.084                                 | 6.55 (5.3; 7.6)                   | 0.14                                  | 6.70 (5.6; 7.8)                   | 0.34                               |
|                         | T/C      | 6.50 (5.6; 7.6)                   |                                       | 6.43 (5.6; 7.6)                   |                                       | 6.50 (5.5; 7.6)                   |                                    |
|                         | C/C      | 6.36 (5.6; 7.8)                   |                                       | 6.00 (5.5; 7.6)                   |                                       | 6.50 (5.7; 8.0)                   |                                    |
| C- peptide              |          |                                   |                                       |                                   |                                       |                                   |                                    |
| rs7838717<br>C>T        | C/C      | 2.53 (1.4; 3.4)                   | 0.78                                  | 2.46 (1.2; 3.3)                   | 0.67                                  | 2.76 (1.4; 3.7)                   | 0.74                               |
|                         | C/T      | 2.24 (1.5; 3.2)                   |                                       | 2.23 (1.6; 3.0)                   |                                       | 2.28 (1.5; 3.5)                   |                                    |
|                         | T/T      | 2.73 (1.3; 3.8)                   |                                       | 2.68 (1.2; 4.4)                   |                                       | 2.73 (1.4; 3.5)                   |                                    |
|                         | T/T      | 2.49 (1.2; 3.8)                   | 0.68                                  | 2.41 (1.2; 3.8)                   | 0.87                                  | 2.53 (1.4; 3.7)                   | 0.60                               |

|                  |     |                 |      |                   |      |                 |       |
|------------------|-----|-----------------|------|-------------------|------|-----------------|-------|
| rs4279640<br>T>C | T/C | 2.28 (1.5; 3.2) |      | 2.19 (1.5; 3.1)   |      | 2.29 (1.5; 3.3) |       |
|                  | C/C | 2.46 (1.5; 3.4) |      | 2.23 (1.4; 3.3)   |      | 2.53 (2.1; 4.3) |       |
| rs3757971<br>T>C | T/T | 2.46 (1.4; 3.4) |      | 2.46 (1.4; 3.4)   |      | 2.50 (1.5; 3.7) |       |
|                  | T/C | 2.28 (1.5; 3.1) | 0.85 | 2.15 (1.5; 3.0)   | 0.88 | 2.31 (1.5; 3.3) | 0.94  |
|                  | C/C | 2.57 (1.2; 3.9) |      | 2.40 (1.3; 3.8)   |      | 2.73 (1.0; 4.0) |       |
| ROS              |     |                 |      |                   |      |                 |       |
| rs7838717<br>C>T | C/C | 3.64 (2.7; 5.1) |      | 3.18 (2.5; 4.8)   |      | 3.80 (2.9; 5.1) |       |
|                  | C/T | 3.81 (2.7; 5.0) | 0.13 | 3.63 (2.4; 4.8)   | 0.56 | 3.87 (2.8; 5.0) | 0.12  |
|                  | T/T | 3.41 (2.3; 4.7) |      | 2.98 (2.3; 4.8)   |      | 3.44 (2.3; 4.7) |       |
| rs4279640<br>T>C | T/T | 3.77 (2.6; 4.9) |      | 3.92 (2.7; 5.1)   |      | 3.73 (2.6; 4.9) |       |
|                  | T/C | 3.62 (2.6; 5.0) | 0.74 | 3.27 (2.4; 4.4)   | 0.27 | 3.71 (2.7; 5.1) | 0.34  |
|                  | C/C | 3.84 (2.7; 5.0) |      | 3.10 (2.5; 4.8)   |      | 4.03 (3.0; 5.2) |       |
| rs3757971<br>T>C | T/T | 3.80 (2.7; 5.1) |      | 3.54 (2.5; 5.2)   |      | 3.89 (2.8; 5.1) |       |
|                  | T/C | 3.70 (2.6; 4.9) | 0.33 | 3.45 (2.3; 4.5)   | 0.96 | 3.79 (2.8; 5.0) | 0.21  |
|                  | C/C | 3.45 (2.3; 4.8) |      | 3.33 (2.3; 4.7)   |      | 3.45 (2.4; 5.0) |       |
| GSH              |     |                 |      |                   |      |                 |       |
| rs7838717<br>C>T | C/C | 0.85 (0.4; 1.6) |      | 0.70 (0.4; 1.7)   |      | 0.87 (0.4; 1.5) |       |
|                  | C/T | 0.84 (0.5; 1.4) | 0.99 | 0.92 (0.4; 1.4)   | 0.40 | 0.79 (0.5; 1.3) | 0.71  |
|                  | T/T | 0.76 (0.5; 2.2) |      | 0.62 (0.2; 0.9)   |      | 1.01 (0.5; 2.6) |       |
| rs4279640<br>T>C | T/T | 0.81 (0.5; 1.3) |      | 0.92 (0.5; 1.1)   |      | 0.73 (0.5; 1.4) |       |
|                  | T/C | 0.82 (0.5; 1.4) | 0.94 | 0.87 (0.3; 1.4)   | 0.72 | 0.80 (0.5; 1.4) | 0.58  |
|                  | C/C | 0.89 (0.5; 1.8) |      | 0.70 (0.5; 1.7)   |      | 0.91 (0.5; 1.8) |       |
| rs3757971<br>T>C | T/T | 0.91 (0.5; 1.6) |      | 0.70 (0.4; 1.7)   |      | 0.92 (0.5; 1.5) |       |
|                  | T/C | 0.71 (0.4; 1.4) | 0.46 | 0.95 (0.4; 1.4)   | 0.66 | 0.65 (0.4; 1.2) | 0.064 |
|                  | C/C | 0.90 (0.7; 1.5) |      | 0.74 (0.5; 0.9)   |      | 1.02 (0.7; 2.4) |       |
| GSSG             |     |                 |      |                   |      |                 |       |
| rs7838717<br>C>T | C/C | 4.16 (1.8; 5.5) |      | 5.47 (2.3; 6.4)   |      | 3.01 (2.2; 3.0) |       |
|                  | C/T | 2.62 (1.9; 3.0) | 0.13 | 1.87 (1.87; 1.87) | 0.51 | 3.95 (1.2; 5.5) | 0.23  |
|                  | T/T | 4.29 (2.0; 5.8) |      | -                 |      | 4.29 (0.1; 5.8) |       |
| rs4279640<br>T>C | T/T | 3.48 (1.4; 5.1) |      | -                 |      | 2.63 (1.8; 5.2) |       |
|                  | T/C | 2.26 (1.8; 4.1) | 0.14 | 2.08 (1.9; 2.3)   | 0.13 | 3.48 (1.4; 5.1) | 0.54  |
|                  | C/C | 5.47 (4.4; 6.4) |      | 5.92 (5.5; 6.4)   |      | 4.38 (1.0; 6.5) |       |
| rs3757971<br>T>C | T/T | 4.38 (2.3; 5.5) |      | 5.47 (2.3; 6.4)   |      | 2.62 (1.8; 3.0) |       |
|                  | T/C | 2.24 (1.8; 3.0) | 0.06 | 1.87 (1.87; 1.87) | 0.51 | 4.16 (1.2; 5.5) | 0.11  |
|                  | C/C | 4.29 (2.1; 5.8) |      | -                 |      | 4.29 (2.1; 5.8) |       |
| GSSG-CellB       |     |                 |      |                   |      |                 |       |
| rs7838717<br>C>T | C/C | 1.29 (0.5; 3.7) |      | 1.64 (0.5; 3.7)   |      | 1.05 (0.4; 3.8) |       |
|                  | C/T | 2.00 (0.6; 3.9) | 0.30 | 2.00 (0.9; 4.0)   | 0.91 | 2.00 (0.6; 3.9) | 0.09  |
|                  | T/T | 1.35 (0.8; 3.5) |      | 2.69 (1.2; 3.9)   |      | 1.19 (0.5; 1.9) |       |

|                           |     |                 |      |                 |      |                 |              |
|---------------------------|-----|-----------------|------|-----------------|------|-----------------|--------------|
| rs4279640<br>T>C          | T/T | 1.95 (0.8; 3.7) |      | 2.63 (1.2; 3.9) |      | 1.93 (0.5; 3.5) |              |
|                           | T/C | 1.36 (0.6; 3.7) | 0.33 | 1.47 (0.6; 3.6) | 0.55 | 1.35 (0.5; 3.7) | 0.59         |
|                           | C/C | 2.23 (0.5; 4.0) |      | 2.27 (0.6; 4.3) |      | 2.01 (0.4; 4.0) |              |
| rs3757971<br>T>C          | T/T | 1.29 (0.5; 3.8) |      | 1.88 (0.6; 3.7) |      | 0.96 (0.4; 3.9) |              |
|                           | T/C | 1.97 (0.6; 3.9) | 0.37 | 1.55 (0.7; 3.9) | 0.99 | 2.00 (0.6; 3.9) | 0.12         |
|                           | C/C | 1.31 (0.6; 3.4) |      | 2.05 (1.2; 4.2) |      | 1.19 (0.3; 2.2) |              |
| Cholesterol               |     |                 |      |                 |      |                 |              |
| rs7838717<br>C>T          | C/C | 4.98 (4.2; 6.0) |      | 4.76 (4.0; 5.7) |      | 5.10 (4.3; 6.1) |              |
|                           | C/T | 5.18 (4.3; 6.2) | 0.11 | 5.05 (4.1; 6.0) | 0.18 | 5.31 (4.4; 6.2) | 0.39         |
|                           | T/T | 5.13 (4.3; 6.2) |      | 4.87 (4.0; 5.8) |      | 5.21 (4.4; 6.4) |              |
| rs4279640<br>T>C          | T/T | 5.20 (4.2; 6.2) |      | 5.10 (4.0; 6.0) |      | 5.25 (4.3; 6.2) |              |
|                           | T/C | 5.09 (4.3; 6.1) | 0.35 | 4.90 (4.1; 5.8) | 0.70 | 5.18 (4.5; 6.2) | 0.75         |
|                           | C/C | 5.00 (4.1; 6.1) |      | 4.86 (4.0; 5.8) |      | 5.17 (4.2; 6.3) |              |
| rs3757971<br>T>C          | T/T | 5.00 (4.2; 6.0) |      | 4.80 (4.0; 5.7) |      | 5.15 (4.3; 6.2) |              |
|                           | T/C | 5.13 (4.3; 6.1) | 0.19 | 5.07 (4.1; 6.0) | 0.30 | 5.20 (4.4; 6.2) | 0.37         |
|                           | C/C | 5.21 (4.2; 6.4) |      | 4.87 (4.0; 5.8) |      | 5.40 (4.4; 6.5) |              |
| Low density lipoproteins  |     |                 |      |                 |      |                 |              |
| rs7838717<br>C>T          | C/C | 2.90 (2.4; 3.9) |      | 2.80 (2.4; 3.5) |      | 3.11 (2.5; 4.3) |              |
|                           | C/T | 3.12 (2.4; 4.1) | 0.33 | 2.68 (2.0; 3.4) | 0.64 | 3.50 (2.7; 4.5) | 0.14         |
|                           | T/T | 3.11 (2.3; 4.0) |      | 2.65 (2.0; 4.0) |      | 3.19 (2.5; 4.4) |              |
| rs4279640<br>T>C          | T/T | 2.90 (2.3; 4.1) |      | 2.55 (1.8; 3.8) |      | 3.32 (2.6; 4.6) |              |
|                           | T/C | 3.10 (2.4; 4.1) | 0.49 | 2.74 (2.2; 3.4) | 0.54 | 3.44 (2.7; 4.4) | 0.15         |
|                           | C/C | 2.90 (2.4; 3.8) |      | 2.80 (2.6; 3.7) |      | 3.10 (2.3; 4.2) |              |
| rs3757971<br>T>C          | T/T | 2.98 (2.4; 3.9) |      | 2.80 (2.3; 3.6) |      | 3.13 (2.5; 4.3) |              |
|                           | T/C | 3.10 (2.4; 4.1) | 0.56 | 2.68 (2.0; 3.4) | 0.37 | 3.50 (2.7; 4.5) | <b>0.033</b> |
|                           | C/C | 2.90 (2.3; 4.0) |      | 2.70 (2.0; 4.0) |      | 3.16 (2.5; 4.4) |              |
| High density lipoproteins |     |                 |      |                 |      |                 |              |
| rs7838717<br>C>T          | C/C | 0.85 (0.7; 1.1) |      | 0.85 (0.7; 1.0) |      | 0.84 (0.7; 1.0) |              |
|                           | C/T | 0.85 (0.7; 1.1) | 0.82 | 0.89 (0.7; 1.1) | 0.70 | 0.85 (0.7; 1.1) | 0.80         |
|                           | T/T | 0.84 (0.8; 1.0) |      | 0.85 (0.7; 1.0) |      | 0.84 (0.8; 1.0) |              |
| rs4279640<br>T>C          | T/T | 0.84 (0.7; 1.1) |      | 0.88 (0.7; 1.1) |      | 0.87 (0.8; 1.1) |              |
|                           | T/C | 0.85 (0.7; 1.1) | 0.46 | 0.84 (0.7; 1.1) | 0.95 | 0.82 (0.7; 1.0) | 0.23         |
|                           | C/C | 0.86 (0.8; 1.0) |      | 0.88 (0.8; 1.0) |      | 0.85 (0.8; 1.0) |              |
| rs3757971<br>T>C          | T/T | 0.85 (0.7; 1.1) |      | 0.85 (0.7; 1.0) |      | 0.84 (0.7; 1.0) |              |
|                           | T/C | 0.84 (0.7; 1.1) | 0.93 | 0.89 (0.7; 1.1) | 0.68 | 0.85 (0.8; 1.1) | 0.60         |
|                           | C/C | 0.84 (0.8; 1.0) |      | 0.86 (0.7; 1.0) |      | 0.84 (0.8; 1.1) |              |
| Triglycerides             |     |                 |      |                 |      |                 |              |
| rs7838717                 | C/C | 2.14 (1.5; 3.0) |      | 2.10 (1.4; 2.8) |      | 2.16 (1.5; 3.0) |              |
|                           | C/T | 2.21 (1.6; 3.0) | 0.54 | 2.16 (1.4; 2.9) | 0.44 | 2.26 (1.7; 3.0) | 0.38         |

|                  |     |                       |      |                       |      |                       |              |
|------------------|-----|-----------------------|------|-----------------------|------|-----------------------|--------------|
| C>T              | T/T | 2.20 (1.6; 3.1)       |      | 2.38 (1.6; 3.2)       |      | 2.16 (1.6; 2.9)       |              |
| rs4279640<br>T>C | T/T | 2.20 (1.6; 3.1)       |      | 2.20 (1.5; 3.1)       |      | 2.20 (1.7; 3.0)       |              |
|                  | T/C | 2.21 (1.6; 3.1)       | 0.35 | 2.03 (1.4; 2.9)       | 0.43 | 2.34 (1.7; 3.1)       | <b>0.039</b> |
|                  | C/C | 2.12 (1.5; 2.8)       |      | 2.22 (1.6; 3.0)       |      | 2.05 (1.5; 2.7)       |              |
| rs3757971<br>T>C | T/T | 2.14 (1.5; 3.0)       |      | 2.11 (1.4; 2.8)       |      | 2.15 (1.5; 3.1)       |              |
|                  | T/C | 2.20 (1.6; 3.0)       | 0.53 | 2.16 (1.4; 3.0)       | 0.57 | 2.25 (1.7; 3.0)       | 0.60         |
|                  | C/C | 2.23 (1.6; 3.1)       |      | 2.22 (1.6; 3.1)       |      | 2.24 (1.6; 3.0)       |              |
| Urea             |     |                       |      |                       |      |                       |              |
| rs7838717<br>C>T | C/C | 6.00 (4.5; 8.0)       |      | 5.55 (4.2; 7.5)       |      | 6.07 (4.8; 8.1)       |              |
|                  | C/T | 6.45 (5.0; 8.9)       | 0.16 | 6.40 (5.0; 8.9)       | 0.58 | 6.50 (5.0; 8.8)       | 0.19         |
|                  | T/T | 6.90 (5.5; 8.2)       |      | 6.40 (5.5; 8.0)       |      | 6.90 (5.3; 9.2)       |              |
| rs4279640<br>T>C | T/T | 6.50 (5.1; 8.7)       |      | 6.30 (5.0; 8.1)       |      | 6.70 (5.2; 8.9)       |              |
|                  | T/C | 6.30 (5.0; 8.6)       | 0.48 | 6.50 (5.0; 8.3)       | 0.27 | 6.30 (5.0; 8.6)       | 0.49         |
|                  | C/C | 5.85 (4.5; 8.0)       |      | 5.35 (4.1; 8.0)       |      | 6.40 (4.7; 8.0)       |              |
| rs3757971<br>T>C | T/T | 5.90 (4.5; 8.0)       |      | 5.25 (4.1; 7.1)       |      | 6.00 (4.8; 8.2)       |              |
|                  | T/C | 6.50 (5.0; 8.8)       | 0.15 | 6.75 (5.3; 9.0)       | 0.08 | 6.40 (4.8; 8.8)       | 0.25         |
|                  | C/C | 6.75 (5.3; 8.2)       |      | 6.30 (5.2; 7.9)       |      | 6.85 (5.3; 8.7)       |              |
| Uric acid        |     |                       |      |                       |      |                       |              |
| rs7838717<br>C>T | C/C | 332.14 (253.3; 406.0) |      | 330.86 (251.9; 403.0) |      | 333.41 (253.7; 410.3) |              |
|                  | C/T | 327.08 (259.7; 399.9) | 0.65 | 335.06 (282.0; 376.7) | 0.64 | 322.98 (251.2; 407.0) | 0.55         |
|                  | T/T | 311.17 (263.4; 390.5) |      | 367.09 (294.2; 414.3) |      | 303.61 (261.7; 377.7) |              |
| rs4279640<br>T>C | T/T | 323.22 (251.7; 387.9) |      | 325.83 (268.2; 400.8) |      | 322.35 (251.2; 378.1) |              |
|                  | T/C | 326.93 (253.7; 396.3) | 0.43 | 335.99 (280.5; 383.6) | 0.88 | 318.40 (248.3; 402.0) | 0.56         |
|                  | C/C | 340.00 (270.1; 411.9) |      | 344.63 (263.1; 402.5) |      | 339.94 (274.8; 420.3) |              |
| rs3757971<br>T>C | T/T | 339.00 (259.6; 410.2) |      | 342.93 (267.6; 402.1) |      | 338.35 (256.1; 412.6) |              |
|                  | T/C | 322.98 (251.1; 385.7) | 0.50 | 334.66 (268.2; 376.7) | 0.75 | 317.43 (246.8; 386.4) | 0.35         |
|                  | C/C | 324.65 (270.9; 401.3) |      | 361.59 (294.2; 414.3) |      | 311.31 (268.8; 387.9) |              |
| Creatinin        |     |                       |      |                       |      |                       |              |
| rs7838717<br>C>T | C/C | 96.00 (85.0; 112.0)   |      | 99.50 (88.0; 115.)    |      | 92.00 (84.0; 110.0)   |              |
|                  | C/T | 95.00 (82.0; 111.0)   | 0.50 | 98.00 (86.9; 115.0)   | 0.56 | 93.00 (80.0; 108.0)   | 0.11         |
|                  | T/T | 92.00 (81.0; 107.0)   |      | 101.00 (90.0; 114.0)  |      | 89.00 (77.5; 103.0)   |              |
| rs4279640<br>T>C | T/T | 94.00 (82.0; 108.0)   |      | 99.00 (89.0; 112.0)   |      | 91.50 (80.0; 107.0)   |              |
|                  | T/C | 94.00 (82.0; 111.0)   | 0.08 | 99.00 (86.9; 118.0)   | 0.90 | 91.00 (79.0; 107.0)   | 0.22         |
|                  | C/C | 98.00 (85.0; 112.0)   |      | 100.00 (90.0; 113.0)  |      | 97.00 (84.0; 110.0)   |              |
| rs3757971<br>T>C | T/T | 96.00 (85.0; 111.0)   |      | 100.00 (89.0; 114.0)  |      | 92.00 (84.0; 109.0)   |              |
|                  | T/C | 94.00 (81.0; 111.0)   | 0.72 | 97.00 (86.9; 117.0)   | 0.30 | 93.00 (78.0; 108.0)   | 0.56         |
|                  | C/C | 95.00 (82.0; 109.0)   |      | 101.00 (90.0; 114.0)  |      | 90.50 (80.0; 105.0)   |              |

| Glomerular filtration rate |     |                    |              |                    |      |                    |              |
|----------------------------|-----|--------------------|--------------|--------------------|------|--------------------|--------------|
| rs7838717<br>C>T           | C/C | 61.00 (51.0; 73.9) |              | 68.50 (59.0; 80.0) |      | 57.39 (47.0; 67.0) |              |
|                            | C/T | 62.00 (50.0; 76.2) | 0.41         | 71.00 (60.2; 83.0) | 0.67 | 58.00 (48.0; 71.0) | 0.45         |
|                            | T/T | 62.00 (50.5; 74.0) |              | 71.76 (60.0; 81.3) |      | 60.25 (49.0; 70.4) |              |
| rs4279640<br>T>C           | T/T | 65.00 (53.9; 75.0) |              | 72.97 (61.8; 82.0) |      | 60.39 (50.0; 70.0) |              |
|                            | T/C | 60.95 (50.0; 75.0) | <b>0.035</b> | 67.00 (55.0; 80.0) | 0.22 | 58.00 (48.6; 72.0) | <b>0.021</b> |
|                            | C/C | 60.46 (49.0; 75.0) |              | 71.00 (60.0; 83.0) |      | 54.80 (45.0; 65.0) |              |
| rs3757971<br>T>C           | T/T | 60.98 (50.0; 73.9) |              | 69.00 (59.0; 80.0) |      | 57.45 (46.7; 66.0) |              |
|                            | T/C | 62.00 (50.8; 76.0) | 0.17         | 70.64 (60.0; 83.5) | 0.86 | 57.75 (48.5; 71.5) | 0.37         |
|                            | C/C | 63.50 (51.0; 75.0) |              | 71.26 (60.0; 81.6) |      | 60.39 (49.0; 71.0) |              |
| Daily Protein              |     |                    |              |                    |      |                    |              |
| rs7838717<br>C>T           | C/C | 0.03 (0.03; 0.03)  |              | 0.03 (0.03; 0.03)  |      | 0.03 (0.03; 0.03)  |              |
|                            | C/T | 0.03 (0.03; 0.03)  | 0.73         | 0.03 (0.03; 0.06)  | 0.82 | 0.03 (0.03; 0.03)  | 0.81         |
|                            | T/T | 0.03 (0.03; 0.06)  |              | 0.03 (0.03; 0.06)  |      | 0.03 (0.03; 0.05)  |              |
| rs4279640<br>T>C           | T/T | 0.03 (0.03; 0.033) |              | 0.03 (0.03; 0.03)  |      | 0.03 (0.03; 0.06)  |              |
|                            | T/C | 0.03 (0.03; 0.03)  | 0.86         | 0.03 (0.03; 0.06)  | 0.96 | 0.03 (0.03; 0.03)  | 0.67         |
|                            | C/C | 0.03 (0.03; 0.03)  |              | 0.03 (0.03; 0.06)  |      | 0.03 (0.03; 0.03)  |              |
| rs3757971<br>T>C           | T/T | 0.03 (0.03; 0.03)  |              | 0.03 (0.03; 0.03)  |      | 0.03 (0.03; 0.03)  |              |
|                            | T/C | 0.03 (0.03; 0.032) | 0.81         | 0.03 (0.03; 0.03)  | 0.89 | 0.03 (0.03; 0.033) | 0.87         |
|                            | C/C | 0.03 (0.03; 0.05)  |              | 0.03 (0.03; 0.06)  |      | 0.03 (0.03; 0.033) |              |
| Insulin                    |     |                    |              |                    |      |                    |              |
| rs7838717<br>C>T           | C/C | -                  |              | -                  |      | -                  |              |
|                            | C/T | 19.40 (10.3; 35.4) | 0.51         | 19.40 (19.4; 19.4) | 0.06 | 22.85 (10.3; 35.4) | 0.69         |
|                            | T/T | 21.00 (21.0; 21.0) |              | -                  |      | 21.00 (21.0; 21.0) |              |
| rs4279640<br>T>C           | T/T | 20.20 (19.4; 21.0) |              | 19.40 (19.4; 19.4) |      | 21.00 (21.0; 21.0) |              |
|                            | T/C | 22.85 (10.3; 35.4) | 1.00         | -                  | 1.00 | 22.85 (10.3; 35.4) | 0.68         |
|                            | C/C | -                  |              | -                  |      | -                  |              |
| rs3757971<br>T>C           | T/T | -                  |              | -                  |      | -                  |              |
|                            | T/C | 19.40 (10.3; 35.4) | 0.51         | 19.40 (19.4; 19.4) | 1.00 | 22.85 (10.3; 35.4) | 0.69         |
|                            | C/C | 21.00 (21.0; 21.0) |              | -                  |      | 21.00 (21.0; 21.0) |              |

<sup>1</sup>Data are presented as median, first and third quartiles

<sup>2</sup> p-values for the Kruskal–Wallis one-way analysis of variance.

Bold indicates statistically significant p- and Q-values.
